# Supplementary material
Source: PubMed Central journal article supplement (PMC2795521)
Supplement: 0906075106_0906075106SI.pdf [file 0906075106_0906075106SI.pdf]

# Supporting Information

Merrill et al. 10.1073/pnas.0906075106

## SI Text

1. Bronk Ramsey C (2001) Development of the radiocarbon calibration program OxCal. *Radiocarbon* 43:355–363.
2. Reimer PJ, et al. (2004) IntCal04 terrestrial radiocarbon age calibration, 0–26 cal kyr bp. *Radiocarbon* 46:1029–1058.
3. Huber EK, Van West CR, eds (2005) *Fence Lake Project* (Statistical Research, Tempe, AZ).
4. Huckell BB, Shackley MS, Huckell LW (2001) *The 1997 Test Excavations at McEuen Cave (AZ W:13:6 ASM), Fishhook Wilderness, Gila Mountains, South-Central Arizona*. Field report submitted to the USDI Bureau of Land Management, Safford, Arizona.
5. Mabry JB (2005) in *Subsistence and Resource Use Strategies of Early Agricultural Communities in Southern Arizona*, ed Diehl MW (Center for Desert Archaeol, Tucson, AZ), pp 113–152.
6. Mabry JB (2006) in *Rio Nuevo Archaeology Program, 2000–2003*, eds Thiel JH, Mabry JB (Center for Desert Archaeol, Tucson, AZ), pp 19.11–19.14.
7. Whittlesey SM, Hesse SJ, Foster MS, eds (2009) *Recurrent Sedentism and the Making of Place* (SWCA Environmental Consultants, Tucson, AZ).
8. Smiley FE (1994) The agricultural transition in the northern Southwest: Patterns in the current chronometric data. *Kiva* 60:165–189.
9. Mabry JB, et al. (1997) *Archaeological Investigations of Early Village Sites in the Middle Santa Cruz Valley* (Center for Desert Archaeol, Tucson, AZ).
10. Gilpin D (1994) Lukachukai and Salinas Springs: Late Archaic/Early Basketmaker habitation sites in the Chinle Valley, northeastern Arizona. *Kiva* 60:203–218.
11. Gregory DA ed (1999) *Excavations in the Santa Cruz River Floodplain* (Center for Desert Archaeol, Tucson, AZ).
12. Upham S, MacNeish RS, Galinat WC, Stevenson CM (1987) Evidence concerning the origin of maize de ocho. *Am Anthropol* 89:410–419.
13. Freeman AKL (2000) in *Farming Through the Ages*, ed Wellman KD (SWCA Environmental Consultants, Tucson, AZ), pp 84–106.
14. Hard RJ, Roney JR (2004) in *Society and Politics in the Greater Southwest*, ed Mills B (Univ Press of Colorado, Boulder, CO), pp 276–294.
15. Vierra BJ, Ford RI (2006) in *Histories of Maize*, eds Staller JE, Tykot RH, Benz BF (Elsevier, Amsterdam), pp 497–510.
16. Wills WH (1988) *Early Prehistoric Agriculture in the American Southwest* (School of American Research Press, Santa Fe, NM).
17. Simmons AH (1986) New evidence for the early use of cultigens in the American Southwest. *Am Antiq* 51:73–89.
18. Bohrer VL (2007) *Preceramic Subsistence in Two Rock Shelters in Fresno Canyon, South Central New Mexico*. Arizona State Museum Archaeological Series (Univ Arizona Press, Tucson, AZ) Vol. 199.
19. Tagg MD (1996) Early cultigens from Fresno Shelter, southeastern New Mexico. *Am Antiq* 61:311–324.
20. Cutler HC, Whitaker TW (1961) History and distribution of the cultivated cucurbits in the Americas. *Am Antiq* 26:469–485.
21. Elson MD, Clark JJ eds (1995) *The Roosevelt Community Development Study. Vol. 3 Paleobotanical and Osteological Analyses* (Center for Desert Archaeol, Tucson, AZ).

**Table S1. The Uto-Aztecan language family**

Uto-Aztecan

---

Northern Uto-Aztecan

- 1. Numic
  - 1.1. Western Numic
    - 1.1.1. Mono
    - 1.1.2. Northern Paiute
  - 1.2. Central Numic
    - 1.2.1. Panamint
    - 1.2.2. Shoshoni
    - 1.2.3. Comanche
  - 1.3. Southern Numic
    - 1.3.1. Ute
    - 1.3.2. Kawaiisu
- 2. Tubatulabal
- 3. Hopi
- 4. Takic
  - 4.1. Serrano
    - 4.1.1. Serrano
    - 4.1.2. Kitanemuk
  - 4.2. Gabrielino-Fernandeño
  - 4.3. Cupan
    - 4.3.1. Cahuilla
    - 4.3.2. Luiseño
    - 4.3.3. Cupeño

Southern Uto-Aztecan

- 5. Tepiman
    - 5.1. Upper Pima
    - 5.2. Lower Pima
    - 5.3. Northern Tepehuan
    - 5.4. Southern Tepehuan
  - 6. Ópatan
    - 6.1. Ópata
    - 6.2. Eudeve
  - 7. Tarahumaran
    - 7.1. Tarahumara
    - 7.2. Guarijio
  - 8. Cahitan (Yaqui–Mayo)
  - 9. Tubar
  - 10. Corachol
    - 10.1. Cora
    - 10.2. Huichol
  - 11. Aztecan
    - 11.1. Pochutec
    - 11.2. General Aztecan
      - 11.2.1. Nahuatl
      - 11.2.2. Pipil
-

Table S2. Directly dated maize older than  $\approx 1400$  cal. B.C. (3100  $^{14}\text{C}$  yr b.p.)

| $^{14}\text{C}$ Lab number | Site                              | Location                | $^{14}\text{C}$ yrs B.P.    | $\delta^{13}\text{C}$ ‰ | Calibrated date<br>(2 $\sigma$ and median) (refs. 1, 2) | Ref.  |
|----------------------------|-----------------------------------|-------------------------|-----------------------------|-------------------------|---------------------------------------------------------|-------|
| Beta-185023                | Old Corn                          | Colorado Plateau, NM    | 3,810 $\pm$ 50              | -10.9                   | 2460–2060 B.C.<br>(2260 B.C.)                           | (3)   |
| Beta-185022                | Old Corn                          | Colorado Plateau, NM    | 3,760 $\pm$ 50              | -10.6                   | 2350–2030 B.C.<br>(2180 B.C.)                           | (3)   |
| Beta-185026                | Old Corn                          | Colorado Plateau, NM    | 3,730 $\pm$ 40              | -8.9                    | 2280–1990 B.C.<br>(2130 B.C.)                           | (3)   |
| Beta-185024                | Old Corn                          | Colorado Plateau, NM    | 3,710 $\pm$ 50              | -9.1                    | 2280–1960 B.C.<br>(2100 B.C.)                           | (3)   |
| Beta-179558                | Old Corn                          | Colorado Plateau, NM    | 3,680 $\pm$ 40              | -11.1                   | 2200–1950 B.C.<br>(2070 B.C.)                           | (3)   |
| Beta-185025                | Old Corn                          | Colorado Plateau, NM    | 3,700 $\pm$ 50              | -9.7                    | 2270–1950 B.C.<br>(2090 B.C.)                           | (3)   |
| Beta-185027                | Old Corn                          | Colorado Plateau, NM    | 3,660 $\pm$ 50              | -10.5                   | 2200–1900 B.C.<br>(2040 B.C.)                           | (3)   |
| Beta-179557                | Old Corn                          | Colorado Plateau, NM    | 3,660 $\pm$ 40              | -10.9                   | 2190–1930 B.C.<br>(2040 B.C.)                           | (3)   |
| Beta-179496                | Old Corn                          | Colorado Plateau, NM    | 3,640 $\pm$ 40              | -10.2                   | 2140–1900 B.C.<br>(2010 B.C.)                           | (3)   |
| Beta-178616                | Old Corn                          | Colorado Plateau, NM    | 3,620 $\pm$ 40              | -10.2                   | 2140–1880 B.C.<br>(1980 B.C.)                           | (3)   |
| CAMS-43177                 | McEuen Cave                       | East Central AZ         | 3,690 $\pm$ 50              |                         | 2270–1940 B.C.<br>(2080 B.C.)                           | (3–5) |
| Beta-175842                | Clearwater,<br>Congress St. Locus | Tucson Basin, AZ        | 3,690 $\pm$ 40              | -10.9                   | 2200–1960 B.C.<br>(2080 B.C.)                           | (6)   |
| Beta-160381                | Clearwater,<br>Congress St. Locus | Tucson Basin, AZ        | 3,650 $\pm$ 40              | -10.4                   | 2140–1910 B.C.<br>(2020 B.C.)                           | (6)   |
| Beta-148409                | Las Capas                         | Tucson Basin, AZ        | 3,670 $\pm$ 40              | -10.6                   | 2200–1940 B.C.<br>(2050 B.C.)                           | (7)   |
| Beta-26275                 | Three Fir Shelter                 | Colorado Plateau, AZ    | 3,610 $\pm$ 170             |                         | 2470–1540 B.C.<br>(1990 B.C.)                           | (8)   |
| AA-13257                   | Square Hearth                     | Tucson Basin, AZ        | 3,505 $\pm$ 65              | -10.0*                  | 2020–1680 B.C.<br>(1830)                                | (9)   |
| AA-9317                    | Lukachukai                        | Colorado Plateau, AZ    | 3,455 $\pm$ 45              |                         | 1890–1640 B.C.<br>(1780 B.C.)                           | (10)  |
| AA-9319                    | Lukachukai                        | Colorado Plateau, AZ    | 3,135 $\pm$ 45              |                         | 1500–1300 B.C.<br>(1410 B.C.)                           | (10)  |
| CAMS-34923                 | Los Pozos,<br>East Locus          | Tucson Basin, AZ        | 4,050 $\pm$ 50 <sup>†</sup> | -10.0*                  | 2860–2470 B.C.<br>(2590 B.C.)                           | (11)  |
| Beta-124111                | Los Pozos,<br>Sweetwater Locus    | Tucson Basin, AZ        | 3,340 $\pm$ 60              | -10.7                   | 1770–1460 B.C.<br>(1630 B.C.)                           | (11)  |
| Beta-124114                | Los Pozos,<br>Sweetwater Locus    | Tucson Basin, AZ        | 3,300 $\pm$ 80              | -10.4                   | 1770–1420 B.C.<br>(1590 B.C.)                           | (11)  |
| Beta-124113                | Los Pozos,<br>Sweetwater Locus    | Tucson Basin, AZ        | 3,230 $\pm$ 50              | -10.3                   | 1620–1420 B.C.<br>(1500 B.C.)                           | (11)  |
| Beta-124112                | Los Pozos,<br>Sweetwater Locus    | Tucson Basin, AZ        | 3,140 $\pm$ 50              | -10.7                   | 1520–1300 B.C.<br>(1420 B.C.)                           | (11)  |
| GX-12720                   | Tornillo Shelter <sup>‡</sup>     | San Andres Mtns, NM     | 3,175 $\pm$ 240             |                         | 2140–910 B.C.<br>(1510 B.C.)                            | (12)  |
| AA-28496                   | Valley Farms                      | Tucson Basin, AZ        | 3,145 $\pm$ 50              |                         | 1520–1300 B.C.<br>(1420 B.C.)                           | (13)  |
| NSRL-12484                 | Cerro Juanaqueña                  | NW Chihuahua            | 3,130 $\pm$ 55              | -10.7                   | 1510–1270 B.C.<br>(1405 B.C.)                           | (14)  |
| AA-34173                   | San Luis de Cabezón               | Northern Rio Grande, NM | 3,125 $\pm$ 45              | -9.4                    | 1500–1300 B.C.<br>(1400 B.C.)                           | (15)  |
| A-4187                     | Bat Cave                          | Mogollon Highlands, NM  | 3,740 $\pm$ 70 <sup>§</sup> |                         | 2430–1950 B.C.<br>(2150 B.C.)                           | (16)  |
| A-4188                     | Bat Cave                          | Mogollon Highlands, NM  | 3,120 $\pm$ 70              |                         | 1600–1130 B.C.<br>(1390 B.C.)                           | (16)  |

\*Assumed.

<sup>†</sup>Ref. 11 questioned this date.<sup>‡</sup>Combined sample.<sup>§</sup>Ref. 16 questioned this date.

**Table S3. Directly dated macrofossils of other cultigens: pepo squash, grain amaranth, common bean, bottle gourd, and cotton**

| Cultigen                   | Number      | Site                     | Location               | <sup>14</sup> C Yrs B.P. | Calibrated Date<br>(2 $\sigma$ and median)<br>(refs. 1, 2) | Ref. |
|----------------------------|-------------|--------------------------|------------------------|--------------------------|------------------------------------------------------------|------|
| <i>Cucurbita pepo</i>      | A-4186      | Bat Cave                 | Mogollon Highlands, NM | 2,980 $\pm$ 120          | 1490–910 B.C.<br>(1200 B.C.)                               | (16) |
| <i>Cucurbita pepo</i>      | A-4182      | Bat Cave                 | Mogollon Highlands, NM | 2,630 $\pm$ 90           | 1000–420 B.C.<br>(790 B.C.)                                | (16) |
| <i>Cucurbita pepo</i>      | A-3388      | Sheep Camp Shelter       | Colorado Plateau, NM   | 2,900 $\pm$ 230          | 1680–540 B.C.<br>(1120 B.C.)                               | (17) |
| <i>Cucurbita pepo</i>      | A-3159      | Sheep Camp Shelter       | Colorado Plateau, NM   | 2,220 $\pm$ 290          | 980 B.C.–A.D. 400<br>(300 B.C.)                            | (17) |
| <i>Cucurbita pepo</i>      | A-4178      | Tularosa Cave            | Mogollon Highlands, NM | 1,900 $\pm$ 70           | 50 B.C.–A.D. 320<br>(A.D. 110)                             | (16) |
| <i>Amaranthus cruentus</i> | Beta-172104 | High Rolls               | Sacramento Mtns, NM    | 2,640 $\pm$ 40           | 900–770 B.C.<br>(810 B.C.)                                 | (18) |
| <i>Phaseolus vulgaris</i>  | A-4179      | Tularosa Cave            | Mogollon Highlands, NM | 2,470 $\pm$ 250          | 1260 B.C.–A.D. 20<br>(590 B.C.)                            | (16) |
| <i>Phaseolus vulgaris</i>  | A-4184      | Bat Cave                 | Mogollon Highlands, NM | 2,140 $\pm$ 110          | 400 B.C.–AD 80<br>(180 B.C.)                               | (16) |
| <i>Phaseolus vulgaris</i>  | AA-6407     | Fresnal Shelter          | Sacramento Mtns, NM    | 2,085 $\pm$ 60           | 350 B.C.–A.D. 50<br>(110 B.C.)                             | (19) |
| <i>Phaseolus vulgaris</i>  | AA-6405     | Fresnal Shelter          | Sacramento Mtns, NM    | 2,015 $\pm$ 65           | 190 B.C.–A.D. 120<br>(30 B.C.)                             | (19) |
| <i>Phaseolus vulgaris</i>  | AA-6404     | Fresnal Shelter          | Sacramento Mtns, NM    | 1,955 $\pm$ 55           | 90 B.C.–A.D. 210<br>(A.D. 40)                              | (19) |
| <i>Lagenaria siceraria</i> | None        | Cordova & Tularosa Caves | Mogollon Highlands, NM | Dated by association     | est. 300 B.C.                                              | (20) |
| <i>Gossypium hirsutum</i>  | AA-13690    | Eagle Ridge              | Tonto Basin, AZ        | 1,725 $\pm$ 65           | A.D. 130–510<br>(A.D. 310)                                 | (21) |
